# Supplementary material for: Molecular characterization and functional analysis of the Schistosoma mekongi Ca2+-dependent cysteine protease (calpain)
Source: Parasit Vectors. 2019 Jul 30;12:383. doi: 10.1186/s13071-019-3639-9 (PMC6668146; doi:10.1186/s13071-019-3639-9)
Supplement: Supplementary file 4 — Additional file 4: Table S3. Identification of rSmeCalp1 using liquid chromatography-tandem mass spectrometry (LC-MS/MS). [file 13071_2019_3639_MOESM4_ESM.xlsx]

## Sheet: calp3
	Additional file 4: Table S3. Identification of rSmeCalp1 using Liquid Chromatography-Tandem Mass Spectrometry (LC-MS/MS).
Header
Search title	Submitted from saree by Mascot Daemon on S-H-I-E-L-D
Timestamp	2016-11-11T09:44:20Z
User
Email
Report URI	http://localhost/mascot/cgi/master_results.pl?file=../data/20161111/F004570.dat
Peak list data path	C:\Users\onrapak.r\Desktop\mgf\Ajpoom_saree_Calp_11Nov2016\Calp3_RE6_01_7933.mgf
Peak list format	Mascot generic
Search type	MIS
Mascot version	2.3.02
Database	schistosoma_protein
Fasta file	schistosoma_protein.fasta
Total sequences	52201
Total residues	17216086
Sequences after taxonomy filter	52201
Number of queries	453
Variable modifications	--------------------------------------------------------
Identifier	Name	Delta	Neutral loss(es)
1	Carbamidomethyl (C)	57.0215
2	Oxidation (M)	15.9949	0	63.9983
Search Parameters	--------------------------------------------------------
Taxonomy filter	All entries
Enzyme	Trypsin
Maximum Missed Cleavages	1
Fixed modifications
Variable modifications	Carbamidomethyl (C),Oxidation (M)
Peptide Mass Tolerance	0.8
Peptide Mass Tolerance Units	Da
Fragment Mass Tolerance	0.8
Fragment Mass Tolerance Units	Da
Mass values	Monoisotopic
Instrument type	ESI-QUAD-TOF
Format parameters	--------------------------------------------------------
Significance threshold	0.05
Max. number of hits	0
Use MudPIT protein scoring	1
Ions score cut-off	0
Include same-set proteins
Include sub-set proteins	0
Include unassigned	0
Require bold red	0
Use homology threshold	0
Group protein families	0
Protein hits	--------------------------------------------------------
prot_hit_num	prot_acc	prot_desc	prot_score	prot_mass	prot_matches	prot_matches_sig	prot_sequences	prot_sequences_sig	prot_cover	prot_pi	pep_query	pep_rank	pep_isbold	pep_isunique	pep_exp_mz	pep_exp_mr	pep_exp_z	pep_calc_mr	pep_delta	pep_miss	pep_score	pep_expect	pep_res_before	pep_seq	pep_res_after	pep_var_mod	pep_var_mod_pos	pep_scan_title
1	gi|2829279	calpain, partial [Schistosoma japonicum]	716	86779	25	18	7	4	10.1	5.38	67	1	1	0	433.233	864.451	2	864.445	0.0053	0	29.49	0.11	K	SQFINTR	E			Cmpd 52, AutoMSn(433.2326), 14.9 min
1	gi|2829279	calpain, partial [Schistosoma japonicum]	716	86779	25	18	7	4	10.1	5.38	68	1	1	0	433.233	864.451	2	864.445	0.006	0	29.05	0.12	K	SQFINTR	E			Cmpd 54, AutoMSn(433.2330), 14.9 min
1	gi|2829279	calpain, partial [Schistosoma japonicum]	716	86779	25	18	7	4	10.1	5.38	69	1	1	0	433.235	864.456	2	864.445	0.011	0	26.1	0.24	K	SQFINTR	E			Cmpd 51, AutoMSn(433.2354), 14.8 min
1	gi|2829279	calpain, partial [Schistosoma japonicum]	716	86779	25	18	7	4	10.1	5.38	129	1	1	0	560.808	1119.6	2	1119.6	0.0047	0	28.66	0.14	R	LEFNPYLPK	T			Cmpd 292, AutoMSn(560.8078), 21.9 min
1	gi|2829279	calpain, partial [Schistosoma japonicum]	716	86779	25	18	7	4	10.1	5.38	130	1	1	0	560.81	1119.61	2	1119.6	0.0097	0	28.41	0.15	R	LEFNPYLPK	T			Cmpd 293, AutoMSn(560.8103), 21.9 min
1	gi|2829279	calpain, partial [Schistosoma japonicum]	716	86779	25	18	7	4	10.1	5.38	140	1	1	0	594.783	1187.55	2	1187.55	0.0044	0	56.6	0.00021	R	NVNAGGCINNR	T	Carbamidomethyl (C)	0.00000010000.0	Cmpd 7, AutoMSn(594.7828), 13.3 min
1	gi|2829279	calpain, partial [Schistosoma japonicum]	716	86779	25	18	7	4	10.1	5.38	141	1	1	0	594.784	1187.55	2	1187.55	0.0061	0	56.58	0.00021	R	NVNAGGCINNR	T	Carbamidomethyl (C)	0.00000010000.0	Cmpd 8, AutoMSn(594.7836), 13.3 min
1	gi|2829279	calpain, partial [Schistosoma japonicum]	716	86779	25	18	7	4	10.1	5.38	142	1	1	0	594.785	1187.56	2	1187.55	0.0099	0	47.94	0.0015	R	NVNAGGCINNR	T	Carbamidomethyl (C)	0.00000010000.0	Cmpd 6, AutoMSn(594.7855), 13.2 min
1	gi|2829279	calpain, partial [Schistosoma japonicum]	716	86779	25	18	7	4	10.1	5.38	160	1	1	0	638.855	1275.69	2	1275.7	-0.003	1	15	2.5	K	RLEFNPYLPK	T			Cmpd 207, AutoMSn(638.8545), 19.7 min
1	gi|2829279	calpain, partial [Schistosoma japonicum]	716	86779	25	18	7	4	10.1	5.38	227	1	1	0	495.614	1483.82	3	1483.8	0.0158	1	27.43	0.13	R	LKTAFETIEAHPK	N			Cmpd 89, AutoMSn(495.6137), 16.2 min
1	gi|2829279	calpain, partial [Schistosoma japonicum]	716	86779	25	18	7	4	10.1	5.38	228	1	1	0	495.615	1483.82	3	1483.8	0.0195	1	39.98	0.0076	R	LKTAFETIEAHPK	N			Cmpd 88, AutoMSn(495.6149), 16.2 min
1	gi|2829279	calpain, partial [Schistosoma japonicum]	716	86779	25	18	7	4	10.1	5.38	239	1	1	0	759.902	1517.79	2	1517.78	0.0056	0	48.78	0.0011	R	IQIVYSPDANVSGR	V			Cmpd 230, AutoMSn(759.9020), 20.3 min
1	gi|2829279	calpain, partial [Schistosoma japonicum]	716	86779	25	18	7	4	10.1	5.38	240	1	1	0	759.902	1517.79	2	1517.78	0.0065	0	59.47	9.1e-05	R	IQIVYSPDANVSGR	V			Cmpd 237, AutoMSn(759.9024), 20.5 min
1	gi|2829279	calpain, partial [Schistosoma japonicum]	716	86779	25	18	7	4	10.1	5.38	241	1	1	0	759.903	1517.79	2	1517.78	0.0067	0	54.02	0.00032	R	IQIVYSPDANVSGR	V			Cmpd 228, AutoMSn(759.9025), 20.3 min
1	gi|2829279	calpain, partial [Schistosoma japonicum]	716	86779	25	18	7	4	10.1	5.38	242	1	1	0	506.939	1517.8	3	1517.78	0.0125	0	38.1	0.012	R	IQIVYSPDANVSGR	V			Cmpd 238, AutoMSn(506.9394), 20.5 min
1	gi|2829279	calpain, partial [Schistosoma japonicum]	716	86779	25	18	7	4	10.1	5.38	243	1	1	0	506.94	1517.8	3	1517.78	0.0158	0	69.44	9.1e-06	R	IQIVYSPDANVSGR	V			Cmpd 231, AutoMSn(506.9405), 20.3 min
1	gi|2829279	calpain, partial [Schistosoma japonicum]	716	86779	25	18	7	4	10.1	5.38	244	1	1	0	506.941	1517.8	3	1517.78	0.0177	0	78.31	1.2e-06	R	IQIVYSPDANVSGR	V			Cmpd 229, AutoMSn(506.9411), 20.3 min
1	gi|2829279	calpain, partial [Schistosoma japonicum]	716	86779	25	18	7	4	10.1	5.38	245	1	1	0	506.941	1517.8	3	1517.78	0.0182	0	73.79	3.4e-06	R	IQIVYSPDANVSGR	V			Cmpd 233, AutoMSn(506.9413), 20.4 min
1	gi|2829279	calpain, partial [Schistosoma japonicum]	716	86779	25	18	7	4	10.1	5.38	402	1	1	1	798.418	2392.23	3	2392.22	0.015	0	68.65	8.8e-06	R	LNDGLIAGHAYSLTGVYPVNYR	G			Cmpd 343, AutoMSn(798.4181), 23.4 min
1	gi|2829279	calpain, partial [Schistosoma japonicum]	716	86779	25	18	7	4	10.1	5.38	403	1	1	1	798.418	2392.23	3	2392.22	0.0153	0	83.82	2.7e-07	R	LNDGLIAGHAYSLTGVYPVNYR	G			Cmpd 355, AutoMSn(798.4182), 23.8 min
1	gi|2829279	calpain, partial [Schistosoma japonicum]	716	86779	25	18	7	4	10.1	5.38	404	1	1	1	798.419	2392.23	3	2392.22	0.0167	0	93.69	2.8e-08	R	LNDGLIAGHAYSLTGVYPVNYR	G			Cmpd 352, AutoMSn(798.4187), 23.8 min
1	gi|2829279	calpain, partial [Schistosoma japonicum]	716	86779	25	18	7	4	10.1	5.38	405	1	1	1	798.419	2392.23	3	2392.22	0.0167	0	75.82	1.7e-06	R	LNDGLIAGHAYSLTGVYPVNYR	G			Cmpd 340, AutoMSn(798.4187), 23.3 min
1	gi|2829279	calpain, partial [Schistosoma japonicum]	716	86779	25	18	7	4	10.1	5.38	407	1	1	1	798.42	2392.24	3	2392.22	0.0194	0	75.07	2e-06	R	LNDGLIAGHAYSLTGVYPVNYR	G			Cmpd 358, AutoMSn(798.4196), 23.9 min
1	gi|2829279	calpain, partial [Schistosoma japonicum]	716	86779	25	18	7	4	10.1	5.38	408	1	1	1	798.42	2392.24	3	2392.22	0.0196	0	62.27	3.8e-05	R	LNDGLIAGHAYSLTGVYPVNYR	G			Cmpd 339, AutoMSn(798.4197), 23.3 min
1	gi|2829279	calpain, partial [Schistosoma japonicum]	716	86779	25	18	7	4	10.1	5.38	409	1	1	1	798.421	2392.24	3	2392.22	0.0238	0	62.63	3.5e-05	R	LNDGLIAGHAYSLTGVYPVNYR	G			Cmpd 342, AutoMSn(798.4211), 23.4 min	emPAI	0.3
2	gi|4239855	calpain [Schistosoma japonicum]	569	86619	21	14	7	4	10.2	5.57	67	1	0	0	433.233	864.451	2	864.445	0.0053	0	29.49	0.11	K	SQFINTR	E			Cmpd 52, AutoMSn(433.2326), 14.9 min
2	gi|4239855	calpain [Schistosoma japonicum]	569	86619	21	14	7	4	10.2	5.57	68	1	0	0	433.233	864.451	2	864.445	0.006	0	29.05	0.12	K	SQFINTR	E			Cmpd 54, AutoMSn(433.2330), 14.9 min
2	gi|4239855	calpain [Schistosoma japonicum]	569	86619	21	14	7	4	10.2	5.57	69	1	0	0	433.235	864.456	2	864.445	0.011	0	26.1	0.24	K	SQFINTR	E			Cmpd 51, AutoMSn(433.2354), 14.8 min
2	gi|4239855	calpain [Schistosoma japonicum]	569	86619	21	14	7	4	10.2	5.57	129	1	0	0	560.808	1119.6	2	1119.6	0.0047	0	28.66	0.14	R	LEFNPYLPK	T			Cmpd 292, AutoMSn(560.8078), 21.9 min
2	gi|4239855	calpain [Schistosoma japonicum]	569	86619	21	14	7	4	10.2	5.57	130	1	0	0	560.81	1119.61	2	1119.6	0.0097	0	28.41	0.15	R	LEFNPYLPK	T			Cmpd 293, AutoMSn(560.8103), 21.9 min
2	gi|4239855	calpain [Schistosoma japonicum]	569	86619	21	14	7	4	10.2	5.57	140	1	0	0	594.783	1187.55	2	1187.55	0.0044	0	56.6	0.00021	R	NVNAGGCINNR	T	Carbamidomethyl (C)	0.00000010000.0	Cmpd 7, AutoMSn(594.7828), 13.3 min
2	gi|4239855	calpain [Schistosoma japonicum]	569	86619	21	14	7	4	10.2	5.57	141	1	0	0	594.784	1187.55	2	1187.55	0.0061	0	56.58	0.00021	R	NVNAGGCINNR	T	Carbamidomethyl (C)	0.00000010000.0	Cmpd 8, AutoMSn(594.7836), 13.3 min
2	gi|4239855	calpain [Schistosoma japonicum]	569	86619	21	14	7	4	10.2	5.57	142	1	0	0	594.785	1187.56	2	1187.55	0.0099	0	47.94	0.0015	R	NVNAGGCINNR	T	Carbamidomethyl (C)	0.00000010000.0	Cmpd 6, AutoMSn(594.7855), 13.2 min
2	gi|4239855	calpain [Schistosoma japonicum]	569	86619	21	14	7	4	10.2	5.57	160	1	0	0	638.855	1275.69	2	1275.7	-0.003	1	15	2.5	K	RLEFNPYLPK	T			Cmpd 207, AutoMSn(638.8545), 19.7 min
2	gi|4239855	calpain [Schistosoma japonicum]	569	86619	21	14	7	4	10.2	5.57	227	1	0	0	495.614	1483.82	3	1483.8	0.0158	1	27.43	0.13	R	LKTAFETIEAHPK	N			Cmpd 89, AutoMSn(495.6137), 16.2 min
2	gi|4239855	calpain [Schistosoma japonicum]	569	86619	21	14	7	4	10.2	5.57	228	1	0	0	495.615	1483.82	3	1483.8	0.0195	1	39.98	0.0076	R	LKTAFETIEAHPK	N			Cmpd 88, AutoMSn(495.6149), 16.2 min
2	gi|4239855	calpain [Schistosoma japonicum]	569	86619	21	14	7	4	10.2	5.57	239	1	0	0	759.902	1517.79	2	1517.78	0.0056	0	48.78	0.0011	R	IQIVYSPDANVSGR	V			Cmpd 230, AutoMSn(759.9020), 20.3 min
2	gi|4239855	calpain [Schistosoma japonicum]	569	86619	21	14	7	4	10.2	5.57	240	1	0	0	759.902	1517.79	2	1517.78	0.0065	0	59.47	9.1e-05	R	IQIVYSPDANVSGR	V			Cmpd 237, AutoMSn(759.9024), 20.5 min
2	gi|4239855	calpain [Schistosoma japonicum]	569	86619	21	14	7	4	10.2	5.57	241	1	0	0	759.903	1517.79	2	1517.78	0.0067	0	54.02	0.00032	R	IQIVYSPDANVSGR	V			Cmpd 228, AutoMSn(759.9025), 20.3 min
2	gi|4239855	calpain [Schistosoma japonicum]	569	86619	21	14	7	4	10.2	5.57	242	1	0	0	506.939	1517.8	3	1517.78	0.0125	0	38.1	0.012	R	IQIVYSPDANVSGR	V			Cmpd 238, AutoMSn(506.9394), 20.5 min
2	gi|4239855	calpain [Schistosoma japonicum]	569	86619	21	14	7	4	10.2	5.57	243	1	0	0	506.94	1517.8	3	1517.78	0.0158	0	69.44	9.1e-06	R	IQIVYSPDANVSGR	V			Cmpd 231, AutoMSn(506.9405), 20.3 min
2	gi|4239855	calpain [Schistosoma japonicum]	569	86619	21	14	7	4	10.2	5.57	244	1	0	0	506.941	1517.8	3	1517.78	0.0177	0	78.31	1.2e-06	R	IQIVYSPDANVSGR	V			Cmpd 229, AutoMSn(506.9411), 20.3 min
2	gi|4239855	calpain [Schistosoma japonicum]	569	86619	21	14	7	4	10.2	5.57	245	1	0	0	506.941	1517.8	3	1517.78	0.0182	0	73.79	3.4e-06	R	IQIVYSPDANVSGR	V			Cmpd 233, AutoMSn(506.9413), 20.4 min
2	gi|4239855	calpain [Schistosoma japonicum]	569	86619	21	14	7	4	10.2	5.57	396	1	1	1	798.09	2391.25	3	2391.23	0.0159	0	74.93	2.3e-06	R	LNNGLIAGHAYSLTGVYPVNYR	G			Cmpd 317, AutoMSn(798.0904), 22.7 min
2	gi|4239855	calpain [Schistosoma japonicum]	569	86619	21	14	7	4	10.2	5.57	397	1	1	1	798.091	2391.25	3	2391.23	0.017	0	80.37	6.5e-07	R	LNNGLIAGHAYSLTGVYPVNYR	G			Cmpd 311, AutoMSn(798.0908), 22.6 min
2	gi|4239855	calpain [Schistosoma japonicum]	569	86619	21	14	7	4	10.2	5.57	398	1	1	1	798.091	2391.25	3	2391.23	0.0175	0	136.91	1.4e-12	R	LNNGLIAGHAYSLTGVYPVNYR	G			Cmpd 314, AutoMSn(798.0910), 22.7 min	emPAI	0.3
3	gi|160937	calcium-activated neutral proteinase [Schistosoma mansoni]	513	86865	30	21	8	6	10.9	5.24	57	1	1	1	425.728	849.441	2	849.434	0.0066	0	48.89	0.0016	R	EVTAQFR	V			Cmpd 62, AutoMSn(425.7278), 15.2 min
3	gi|160937	calcium-activated neutral proteinase [Schistosoma mansoni]	513	86865	30	21	8	6	10.9	5.24	58	1	1	1	425.728	849.442	2	849.434	0.0071	0	45.3	0.0036	R	EVTAQFR	V			Cmpd 57, AutoMSn(425.7281), 15.0 min
3	gi|160937	calcium-activated neutral proteinase [Schistosoma mansoni]	513	86865	30	21	8	6	10.9	5.24	59	1	1	1	425.728	849.442	2	849.434	0.0072	0	54.63	0.00042	R	EVTAQFR	V			Cmpd 59, AutoMSn(425.7281), 15.1 min
3	gi|160937	calcium-activated neutral proteinase [Schistosoma mansoni]	513	86865	30	21	8	6	10.9	5.24	67	1	0	0	433.233	864.451	2	864.445	0.0053	0	29.49	0.11	K	SQFINTR	E			Cmpd 52, AutoMSn(433.2326), 14.9 min
3	gi|160937	calcium-activated neutral proteinase [Schistosoma mansoni]	513	86865	30	21	8	6	10.9	5.24	68	1	0	0	433.233	864.451	2	864.445	0.006	0	29.05	0.12	K	SQFINTR	E			Cmpd 54, AutoMSn(433.2330), 14.9 min
3	gi|160937	calcium-activated neutral proteinase [Schistosoma mansoni]	513	86865	30	21	8	6	10.9	5.24	69	1	0	0	433.235	864.456	2	864.445	0.011	0	26.1	0.24	K	SQFINTR	E			Cmpd 51, AutoMSn(433.2354), 14.8 min
3	gi|160937	calcium-activated neutral proteinase [Schistosoma mansoni]	513	86865	30	21	8	6	10.9	5.24	140	1	0	0	594.783	1187.55	2	1187.55	0.0044	0	56.6	0.00021	R	NVNAGGCINNR	T	Carbamidomethyl (C)	0.00000010000.0	Cmpd 7, AutoMSn(594.7828), 13.3 min
3	gi|160937	calcium-activated neutral proteinase [Schistosoma mansoni]	513	86865	30	21	8	6	10.9	5.24	141	1	0	0	594.784	1187.55	2	1187.55	0.0061	0	56.58	0.00021	R	NVNAGGCINNR	T	Carbamidomethyl (C)	0.00000010000.0	Cmpd 8, AutoMSn(594.7836), 13.3 min
3	gi|160937	calcium-activated neutral proteinase [Schistosoma mansoni]	513	86865	30	21	8	6	10.9	5.24	142	1	0	0	594.785	1187.56	2	1187.55	0.0099	0	47.94	0.0015	R	NVNAGGCINNR	T	Carbamidomethyl (C)	0.00000010000.0	Cmpd 6, AutoMSn(594.7855), 13.2 min
3	gi|160937	calcium-activated neutral proteinase [Schistosoma mansoni]	513	86865	30	21	8	6	10.9	5.24	170	1	1	1	657.32	1312.63	2	1312.62	0.0058	0	51.25	0.00071	R	TTYWTNPQFR	I			Cmpd 216, AutoMSn(657.3202), 19.9 min
3	gi|160937	calcium-activated neutral proteinase [Schistosoma mansoni]	513	86865	30	21	8	6	10.9	5.24	171	1	1	1	657.321	1312.63	2	1312.62	0.0071	0	51.9	0.00061	R	TTYWTNPQFR	I			Cmpd 218, AutoMSn(657.3209), 20.0 min
3	gi|160937	calcium-activated neutral proteinase [Schistosoma mansoni]	513	86865	30	21	8	6	10.9	5.24	172	1	1	1	657.321	1312.63	2	1312.62	0.0077	0	46.93	0.0019	R	TTYWTNPQFR	I			Cmpd 215, AutoMSn(657.3211), 19.9 min
3	gi|160937	calcium-activated neutral proteinase [Schistosoma mansoni]	513	86865	30	21	8	6	10.9	5.24	217	1	1	1	725.362	1448.71	2	1448.7	0.0054	0	50.16	0.0008	R	LDEAIFSGQWQR	N			Cmpd 329, AutoMSn(725.3624), 23.0 min
3	gi|160937	calcium-activated neutral proteinase [Schistosoma mansoni]	513	86865	30	21	8	6	10.9	5.24	218	1	1	1	725.363	1448.71	2	1448.7	0.0058	0	41.85	0.0054	R	LDEAIFSGQWQR	N			Cmpd 331, AutoMSn(725.3626), 23.1 min
3	gi|160937	calcium-activated neutral proteinase [Schistosoma mansoni]	513	86865	30	21	8	6	10.9	5.24	219	1	1	1	725.363	1448.71	2	1448.7	0.0075	0	37.65	0.014	R	LDEAIFSGQWQR	N			Cmpd 323, AutoMSn(725.3634), 22.9 min
3	gi|160937	calcium-activated neutral proteinase [Schistosoma mansoni]	513	86865	30	21	8	6	10.9	5.24	220	1	1	1	725.363	1448.71	2	1448.7	0.0075	0	40.91	0.0068	R	LDEAIFSGQWQR	N			Cmpd 324, AutoMSn(725.3634), 22.9 min
3	gi|160937	calcium-activated neutral proteinase [Schistosoma mansoni]	513	86865	30	21	8	6	10.9	5.24	221	1	1	1	725.364	1448.71	2	1448.7	0.0083	0	49.01	0.001	R	LDEAIFSGQWQR	N			Cmpd 328, AutoMSn(725.3638), 23.0 min
3	gi|160937	calcium-activated neutral proteinase [Schistosoma mansoni]	513	86865	30	21	8	6	10.9	5.24	222	1	1	1	725.364	1448.71	2	1448.7	0.0083	0	52.37	0.00048	R	LDEAIFSGQWQR	N			Cmpd 326, AutoMSn(725.3638), 22.9 min
3	gi|160937	calcium-activated neutral proteinase [Schistosoma mansoni]	513	86865	30	21	8	6	10.9	5.24	223	1	1	1	483.914	1448.72	3	1448.7	0.0144	0	54.08	0.00033	R	LDEAIFSGQWQR	N			Cmpd 330, AutoMSn(483.9137), 23.0 min
3	gi|160937	calcium-activated neutral proteinase [Schistosoma mansoni]	513	86865	30	21	8	6	10.9	5.24	224	1	1	1	483.916	1448.73	3	1448.7	0.0211	0	39.06	0.01	R	LDEAIFSGQWQR	N			Cmpd 327, AutoMSn(483.9159), 23.0 min
3	gi|160937	calcium-activated neutral proteinase [Schistosoma mansoni]	513	86865	30	21	8	6	10.9	5.24	227	1	0	0	495.614	1483.82	3	1483.8	0.0158	1	27.43	0.13	R	LKTAFETIEAHPK	N			Cmpd 89, AutoMSn(495.6137), 16.2 min
3	gi|160937	calcium-activated neutral proteinase [Schistosoma mansoni]	513	86865	30	21	8	6	10.9	5.24	228	1	0	0	495.615	1483.82	3	1483.8	0.0195	1	39.98	0.0076	R	LKTAFETIEAHPK	N			Cmpd 88, AutoMSn(495.6149), 16.2 min
3	gi|160937	calcium-activated neutral proteinase [Schistosoma mansoni]	513	86865	30	21	8	6	10.9	5.24	270	1	1	1	535.946	1604.82	3	1604.81	0.0097	1	65.36	2.1e-05	R	RLDEAIFSGQWQR	N			Cmpd 260, AutoMSn(535.9458), 21.1 min
3	gi|160937	calcium-activated neutral proteinase [Schistosoma mansoni]	513	86865	30	21	8	6	10.9	5.24	271	1	1	1	535.947	1604.82	3	1604.81	0.0134	1	67.29	1.3e-05	R	RLDEAIFSGQWQR	N			Cmpd 263, AutoMSn(535.9471), 21.2 min
3	gi|160937	calcium-activated neutral proteinase [Schistosoma mansoni]	513	86865	30	21	8	6	10.9	5.24	272	1	1	1	535.947	1604.82	3	1604.81	0.0139	1	46.71	0.0015	R	RLDEAIFSGQWQR	N			Cmpd 266, AutoMSn(535.9472), 21.2 min
3	gi|160937	calcium-activated neutral proteinase [Schistosoma mansoni]	513	86865	30	21	8	6	10.9	5.24	413	1	1	1	1266.11	2530.2	2	2530.21	-0.0136	1	7.09	11	R	TLWEDPDFPANDKAIGNLPDFR	E			Cmpd 433, AutoMSn(1266.1069), 26.1 min
3	gi|160937	calcium-activated neutral proteinase [Schistosoma mansoni]	513	86865	30	21	8	6	10.9	5.24	414	1	1	1	1266.11	2530.2	2	2530.21	-0.0112	1	4.78	19	R	TLWEDPDFPANDKAIGNLPDFR	E			Cmpd 430, AutoMSn(1266.1081), 26.0 min
3	gi|160937	calcium-activated neutral proteinase [Schistosoma mansoni]	513	86865	30	21	8	6	10.9	5.24	415	1	1	1	1266.11	2530.21	2	2530.21	-0.0044	1	13.4	2.6	R	TLWEDPDFPANDKAIGNLPDFR	E			Cmpd 436, AutoMSn(1266.1115), 26.2 min
3	gi|160937	calcium-activated neutral proteinase [Schistosoma mansoni]	513	86865	30	21	8	6	10.9	5.24	416	1	1	1	844.414	2530.22	3	2530.21	0.0064	1	25.25	0.17	R	TLWEDPDFPANDKAIGNLPDFR	E			Cmpd 435, AutoMSn(844.4137), 26.2 min
3	gi|160937	calcium-activated neutral proteinase [Schistosoma mansoni]	513	86865	30	21	8	6	10.9	5.24	417	2	1	1	844.417	2530.23	3	2530.21	0.0171	1	15.26	1.7	R	TLWEDPDFPANDKAIGNLPDFR	E			Cmpd 429, AutoMSn(844.4173), 26.0 min	emPAI	0.4
